# Supplementary material
Source: MDPI journal article supplement (https://www.mdpi.com/2076-3417/14/2/635)
Supplement: s1 [file s1]

## Supplementary Materials

**Table S1.** PSNR comparison data from different algorithms processing Lena with increasing noise density.

| Noise density | PDBTMF | MDBMF | ADTMF | Proposed |
|---------------|--------|-------|-------|----------|
| 5%            | 38.79  | 38.96 | 26.94 | 29.14    |
| 10%           | 36.11  | 36    | 26.79 | 28.73    |
| 15%           | 34.19  | 33.69 | 26.54 | 28.4     |
| 20%           | 32.27  | 32.36 | 26.01 | 28.11    |
| 25%           | 31.16  | 31.31 | 25    | 27.77    |
| 30%           | 30.56  | 30.56 | 23.42 | 27.41    |
| 35%           | 29.91  | 29.57 | 21.78 | 27.2     |
| 40%           | 29.2   | 29.19 | 19.91 | 26.99    |
| 45%           | 28.19  | 28.62 | 18.09 | 26.67    |
| 50%           | 27.54  | 27.87 | 16.46 | 26.48    |
| 55%           | 26.15  | 27.27 | 14.84 | 26.27    |
| 60%           | 24.74  | 26.85 | 13.46 | 26.05    |
| 65%           | 22.96  | 26.18 | 12.12 | 25.89    |
| 70%           | 21.06  | 25.55 | 10.87 | 25.72    |
| 75%           | 18.96  | 24.93 | 9.8   | 25.58    |
| 80%           | 16.81  | 23.65 | 8.74  | 25.37    |
| 85%           | 14.78  | 22.6  | 7.8   | 25.27    |
| 90%           | 12.7   | 20.76 | 6.95  | 25.02    |
| 95%           | 10.63  | 18.11 | 6.17  | 24.97    |

**Table S2.** SSIM comparison data from different algorithms processing Lena with increasing noise density.

| Noise density | PDBTMF | MDBMF  | ADTMF  | Proposed |
|---------------|--------|--------|--------|----------|
| 5%            | 0.9883 | 0.9883 | 0.9616 | 0.8321   |
| 10%           | 0.9784 | 0.9773 | 0.9547 | 0.8255   |
| 15%           | 0.9675 | 0.9671 | 0.942  | 0.8215   |
| 20%           | 0.9578 | 0.9576 | 0.9186 | 0.8181   |
| 25%           | 0.9485 | 0.9488 | 0.8713 | 0.8145   |
| 30%           | 0.9403 | 0.9493 | 0.7886 | 0.8124   |
| 35%           | 0.9307 | 0.9405 | 0.6985 | 0.8112   |
| 40%           | 0.9191 | 0.9225 | 0.569  | 0.8106   |
| 45%           | 0.9037 | 0.9128 | 0.4419 | 0.8093   |
| 50%           | 0.8807 | 0.9008 | 0.3229 | 0.8088   |
| 55%           | 0.8401 | 0.8894 | 0.2207 | 0.8081   |
| 60%           | 0.7757 | 0.8748 | 0.1527 | 0.8072   |
| 65%           | 0.6805 | 0.8587 | 0.1062 | 0.8068   |
| 70%           | 0.5657 | 0.8391 | 0.071  | 0.8065   |
| 75%           | 0.415  | 0.8131 | 0.0486 | 0.8062   |

|     |        |        |        |        |
|-----|--------|--------|--------|--------|
| 80% | 0.2804 | 0.7742 | 0.0335 | 0.8058 |
| 85% | 0.1731 | 0.7243 | 0.0227 | 0.8057 |
| 90% | 0.0927 | 0.6457 | 0.0149 | 0.8052 |
| 95% | 0.0418 | 0.5039 | 0.009  | 0.8051 |

**Table S3.** PSNR comparison data from different algorithms processing Cameraman with increasing noise density.

| Noise density | PDBTMF | MDBMF | ADTMF | Proposed |
|---------------|--------|-------|-------|----------|
| 5%            | 33.95  | 34.81 | 22.96 | 23.1     |
| 10%           | 29.72  | 31.15 | 22.78 | 22.92    |
| 15%           | 27.98  | 29.41 | 22.46 | 22.78    |
| 20%           | 26.34  | 28.22 | 22.12 | 22.62    |
| 25%           | 24.26  | 26.91 | 21.51 | 22.38    |
| 30%           | 23.15  | 26.54 | 20.58 | 22.27    |
| 35%           | 21.93  | 25.52 | 19.41 | 22.13    |
| 40%           | 20.84  | 24.61 | 18.22 | 21.89    |
| 45%           | 19.88  | 24.06 | 17.03 | 21.82    |
| 50%           | 19.3   | 23.44 | 15.42 | 21.76    |
| 55%           | 18.68  | 22.91 | 13.8  | 21.59    |
| 60%           | 17.71  | 22.3  | 12.79 | 21.45    |
| 65%           | 16.89  | 21.85 | 11.37 | 21.29    |
| 70%           | 16.41  | 21.14 | 10.21 | 21.19    |
| 75%           | 15.38  | 20.33 | 9.07  | 21.04    |
| 80%           | 13.99  | 19.52 | 8.32  | 21.02    |
| 85%           | 12.85  | 18.5  | 7.38  | 20.81    |
| 90%           | 11.19  | 17.15 | 6.5   | 20.77    |
| 95%           | 9.64   | 15.02 | 5.77  | 20.61    |

**Table S4.** SSIM comparison data from different algorithms processing Cameraman with increasing noise density.

| Noise density | PDBTMF | MDBMF  | ADTMF  | Proposed |
|---------------|--------|--------|--------|----------|
| 5%            | 0.9775 | 0.9802 | 0.9296 | 0.7549   |
| 10%           | 0.9553 | 0.9612 | 0.9209 | 0.7477   |
| 15%           | 0.9331 | 0.9453 | 0.9044 | 0.7413   |
| 20%           | 0.9114 | 0.9301 | 0.883  | 0.7362   |
| 25%           | 0.8779 | 0.9167 | 0.8382 | 0.7301   |
| 30%           | 0.8524 | 0.9048 | 0.7651 | 0.7292   |
| 35%           | 0.8288 | 0.8913 | 0.6729 | 0.7256   |
| 40%           | 0.7999 | 0.8786 | 0.575  | 0.7234   |
| 45%           | 0.7729 | 0.8636 | 0.4617 | 0.7224   |
| 50%           | 0.7422 | 0.8481 | 0.3421 | 0.7217   |
| 55%           | 0.7036 | 0.8331 | 0.2431 | 0.7202   |
| 60%           | 0.6358 | 0.8126 | 0.1847 | 0.7193   |

|     |        |        |        |        |
|-----|--------|--------|--------|--------|
| 65% | 0.565  | 0.7936 | 0.1291 | 0.7178 |
| 70% | 0.4685 | 0.7703 | 0.0894 | 0.7174 |
| 75% | 0.3453 | 0.7403 | 0.0631 | 0.7165 |
| 80% | 0.2388 | 0.7034 | 0.0491 | 0.7165 |
| 85% | 0.1524 | 0.6604 | 0.0328 | 0.7152 |
| 90% | 0.0878 | 0.5938 | 0.0212 | 0.7158 |
| 95% | 0.0445 | 0.4825 | 0.0111 | 0.7145 |

**Table S5.** PSNR comparison data from different algorithms processing Covid with increasing noise density.

| Noise density | PDBTMF | MDBMF | ADTMF | Proposed |
|---------------|--------|-------|-------|----------|
| 5%            | 38.07  | 39.8  | 27.76 | 26.22    |
| 10%           | 35.01  | 36.44 | 27.54 | 26.16    |
| 15%           | 33.12  | 34.65 | 27.18 | 26.05    |
| 20%           | 31.42  | 33.25 | 26.45 | 25.97    |
| 25%           | 30.18  | 32.29 | 25.28 | 25.86    |
| 30%           | 29.06  | 31.37 | 23.7  | 25.8     |
| 35%           | 28.2   | 30.48 | 21.93 | 25.72    |
| 40%           | 27.47  | 29.88 | 20.06 | 25.63    |
| 45%           | 26.54  | 29.18 | 18.19 | 25.57    |
| 50%           | 25.83  | 28.62 | 16.5  | 25.44    |
| 55%           | 24.86  | 27.99 | 14.93 | 25.38    |
| 60%           | 23.86  | 27.42 | 13.46 | 25.33    |
| 65%           | 22.32  | 26.78 | 12.15 | 25.24    |
| 70%           | 20.71  | 26.13 | 10.95 | 25.15    |
| 75%           | 18.84  | 25.49 | 9.82  | 25.11    |
| 80%           | 16.81  | 24.66 | 8.81  | 25.01    |
| 85%           | 14.83  | 23.61 | 7.86  | 24.95    |
| 90%           | 12.76  | 22.38 | 7.02  | 24.87    |
| 95%           | 10.84  | 20.44 | 6.24  | 24.78    |

**Table S6.** SSIM comparison data from different algorithms processing Covid with increasing noise density.

| Noise density | PDBTMF | MDBMF  | ADTMF  | Proposed |
|---------------|--------|--------|--------|----------|
| 5%            | 0.9872 | 0.9887 | 0.9751 | 0.5171   |
| 10%           | 0.9744 | 0.9769 | 0.9626 | 0.516    |
| 15%           | 0.9612 | 0.9649 | 0.9458 | 0.5145   |
| 20%           | 0.9463 | 0.9522 | 0.9177 | 0.5133   |
| 25%           | 0.9319 | 0.9392 | 0.874  | 0.5123   |
| 30%           | 0.9161 | 0.9247 | 0.8083 | 0.5118   |
| 35%           | 0.8992 | 0.9089 | 0.7186 | 0.5113   |

---

|     |        |        |        |        |
|-----|--------|--------|--------|--------|
| 40% | 0.8807 | 0.8927 | 0.6094 | 0.5109 |
| 45% | 0.8581 | 0.874  | 0.4869 | 0.5105 |
| 50% | 0.8311 | 0.854  | 0.3668 | 0.51   |
| 55% | 0.7909 | 0.831  | 0.2645 | 0.5097 |
| 60% | 0.7388 | 0.8067 | 0.1808 | 0.5095 |
| 65% | 0.6599 | 0.7757 | 0.12   | 0.5093 |
| 70% | 0.5616 | 0.7398 | 0.0797 | 0.5091 |
| 75% | 0.4384 | 0.6979 | 0.0517 | 0.5091 |
| 80% | 0.3067 | 0.6429 | 0.0338 | 0.5089 |
| 85% | 0.1901 | 0.5692 | 0.0225 | 0.5087 |
| 90% | 0.0991 | 0.4717 | 0.0141 | 0.5086 |
| 95% | 0.0424 | 0.3371 | 0.0076 | 0.5085 |

---
